# Supplementary material for: Slow magnetic relaxation in a cobalt magnetic chain
Source: Royal Society of Chemistry journal article supplement (doi:10.1039/c1cc00036e), 2011-01-01
Supplement: c1cc00036e.pdf [file c1cc00036e.pdf]

## Slow magnetic relaxation in a cobalt magnetic chain

Chen-I Yang,<sup>a</sup> Po-Hsiang Chuang,<sup>a,b</sup> Kuang-Lieh Lu<sup>a,\*</sup>

<sup>a</sup>Institute of Chemistry, Academia Sinica, Taipei 115, Taiwan; <sup>b</sup>Graduate Institute of Engineering, National Taiwan University of Science and Technology, Taipei 106, Taiwan

|                   | Index                                                                                                                                                                                            | Page |
|-------------------|--------------------------------------------------------------------------------------------------------------------------------------------------------------------------------------------------|------|
|                   | Experimental section                                                                                                                                                                             | S2   |
| <b>Table 1S.</b>  | Crystallographic data for complex <b>1</b> .                                                                                                                                                     | S4   |
| <b>Figure 1S.</b> | 2D layer structure of <b>1</b> connected by H bonding.                                                                                                                                           | S5   |
| <b>Figure 2S.</b> | Plot of $\chi_M^{-1}$ ( $\circ$ ) vs. temperature for a microcrystalline sample of complex <b>1</b> . The solid line represents the best fit $\chi_M^{-1}$ above 50 K with a Curie–Weiss law.    | S6   |
| <b>Figure 3S.</b> | ZFC/FC magnetization for <b>1</b> at an applied field of 50 G.                                                                                                                                   | S7   |
| <b>Figure 4S.</b> | Plots of in-phase ( $\chi_M'$ ) of ac susceptibility vs. frequency in a 3.5 G ac field oscillating at the indicate temperatures for complex <b>1</b> .                                           | S8   |
| <b>Figure 5S.</b> | Plots of in-phase ( $\chi_M'T$ ) (Top) and out-off-phase ( $\chi_M''$ ) (Bottom) of ac susceptibility vs. $T$ in a 3.5 G ac field oscillating at the indicate frequencies for complex <b>1</b> . | S9   |
| <b>Figure 6S.</b> | Plot of $\ln(\chi_M T)$ vs. $T^{-1}$ for <b>1</b> . Solid line represents the fit of $\chi T = C_{\text{eff}} \exp(\Delta_{\text{E}}/k_B T)$ between 8 and 14 K.                                 | S10  |
| <b>Figure 7S.</b> | Plot of $C_p$ vs. $T$ for a pellet piece polycrystalline of <b>1</b> measured on grounded crystals under zero applied field.                                                                     | S11  |

### **Synthesis:**

A solution of 2,3-dihydroxyquinoxaline (164.3 mg, 1.0 mmol) and  $\text{Co}(\text{OAc})_2 \cdot 4\text{H}_2\text{O}$  (251.8 mg, 0.99 mmol) in 10 mL of THF and 0.25 mL of  $\text{NEt}_3$  was sealed in a Teflon-lined stainless steel vessel (23 mL). The mixture was heated according to the following temperature program: increasing the temperature to 140 °C at 18.3 °C/h, holding at 140 °C for 72 h, and then cooling to 30 °C at a rate of 2.3 °C/h. The deep purple block crystals suitable for single-crystal X-ray diffraction analysis were obtained. The crystals were rinsed a few times with DMF and ether, and dried in air. Yield: 67.8%. Anal. calcd for  $\text{C}_{10}\text{H}_8\text{CoN}_2\text{O}_4$ : C, 43.03; H, 2.89; N, 10.04. Found: C, 42.63; H, 2.62; N, 9.73.

**X-ray Crystallography.** Diffraction measurements for complex **1** were carried out using a Bruker APEXII CCD diffractometer with graphite-monochromated Mo  $K_\alpha$  radiation ( $\lambda = 0.7107 \text{ \AA}$ ). Data collation parameters of **1** are listed in Table S1. Structure was solved by direct methods and refined using the SHELXL-97<sup>1</sup> program by full-matrix least-squares on  $F^2$  values. All non-hydrogen atoms were refined anisotropically, whereas the hydrogen atoms were placed in ideal, calculated positions, with isotropic thermal parameters riding on their respective carbon atoms.

**Magnetic measurement.** Variable temperature dc magnetic susceptibility measurements were collected on microcrystalline samples, restrained in eicosane to prevent torquing, on a Quantum Design MPMS SQUID-VSM magnetometer equipped with a 7.0 Tesla magnet and operating in the range of 1.8–300.0 K. AC magnetic susceptibility were performed on aligid on a Quantum Design MMPS magnetometer. Diamagnetic corrections were estimated from

Pascal's constants<sup>2</sup> and subtracted from the experimental susceptibility data to obtain the molar paramagnetic susceptibility of the compounds. Measurements of the heat capacity for a polycrystalline sample (pellet piece) of complex **1** between  $T = 1.8$  K and  $T = 20$  K were made by a Quantum Design PPMS instrument using a hybrid adiabatic relaxation method. The two-tau relaxation method was used to determine the heat capacity with the PPMS software.

**Other Studies.** Infrared spectra were recorded in the solid state (KBr pellets) on a Perkin-Elmer PARAGON 1000 FT-IR spectrometer in the  $400\text{--}4000$   $\text{cm}^{-1}$  range. Elemental analyses have been carried out by using a Perkin-Elmer TGA-7 TG analyzer.

1. Sheldrick, G. M. *SHELXL-97*; University of Gottingen: Gottingen, Germany, 1997.
2. Boudreaux, E. A.; Mulay, L. N. *Theory and Application of Molecular Paramagnetism*, Wiley J. & Sons, New York, 1976; p. 491.

**Table 1S.** Crystallographic data for complex **1**

| <b>1</b>                                            |                                                                             |
|-----------------------------------------------------|-----------------------------------------------------------------------------|
| Empirical formula                                   | C <sub>10</sub> H <sub>8</sub> CoN <sub>2</sub> O <sub>4</sub>              |
| Formula weight                                      | 279.11                                                                      |
| Temperature                                         | 200(2) K                                                                    |
| Wavelength                                          | 0.71073 Å                                                                   |
| Crystal system                                      | Monoclinic                                                                  |
| Space group                                         | <i>P</i> 2 <sub>1</sub> / <i>c</i>                                          |
| Unit cell dimensions                                | <i>a</i> = 10.840(3) Å<br><i>b</i> = 4.8670(14) Å<br><i>c</i> = 19.354(6) Å |
| Volume                                              | 1018.4(5) Å <sup>3</sup>                                                    |
| <i>Z</i>                                            | 4                                                                           |
| Density (calculated)                                | 1.365 Mg/m <sup>3</sup>                                                     |
| Absorption coefficient                              | 1.266 mm <sup>-1</sup>                                                      |
| <i>F</i> (000)                                      | 423                                                                         |
| Crystal size                                        | 0.4 x 0.1 x 0.3 mm <sup>3</sup>                                             |
| Theta range for data collection                     | 1.88 to 28.58°                                                              |
| Index ranges                                        | -14 ≤ <i>h</i> ≤ 14, -5 ≤ <i>k</i> ≤ 6,<br>-17 ≤ <i>l</i> ≤ 26              |
| Reflections collected                               | 7171                                                                        |
| Independent reflections                             | 2579 [R(int) = 0.0343]                                                      |
| Completeness to theta = 25.00°                      | 99.0%                                                                       |
| Absorption correction                               | Semi-empirical from equivalents                                             |
| Refinement method                                   | Full-matrix least-squares on <i>F</i> <sup>2</sup>                          |
| Data / restraints / parameters                      | 2579 / 0 / 156                                                              |
| Goodness-of-fit on <i>F</i> <sup>2</sup>            | 1.045                                                                       |
| Final <i>R</i> indices [ <i>I</i> > 2σ( <i>I</i> )] | <i>R</i> 1 <sup>a</sup> = 0.0354, <i>wR</i> 2 <sup>b</sup> = 0.0911         |
| <i>R</i> indices (all data)                         | <i>R</i> 1 = 0.0444, <i>wR</i> 2 = 0.0962                                   |
| Largest diff. peak and hole                         | 0.743 and -0.711 e.Å <sup>-3</sup>                                          |

$${}^a R1 = (\sum ||F_o| - |F_c||) / \sum |F_o| \quad {}^b wR2 = [\sum [w(F_o^2 - F_c^2)^2] / \sum [w(F_o^2)^2]]^{1/2}$$

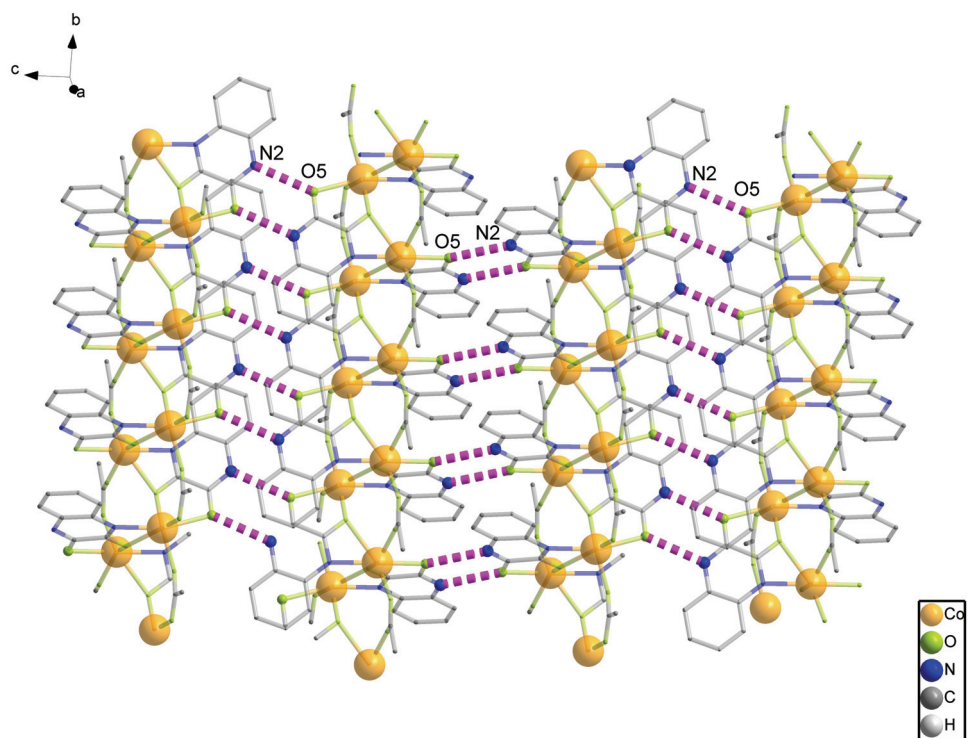

**Figure 1S.** 2D layer structure of **1** connected by H bonding.

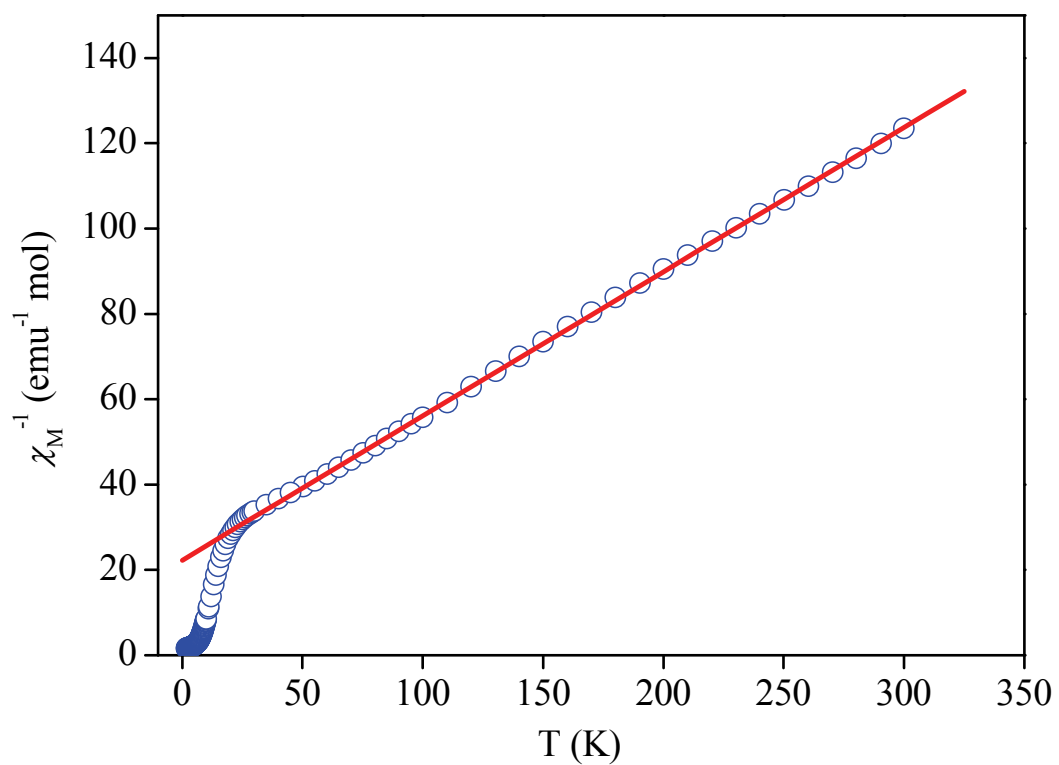

**Figure 2S.** Plot of  $\chi_M^{-1}$  (○) vs. temperature for a microcrystalline sample of complex **1**. The solid line represents the best fit  $\chi_M^{-1}$  above 50 K with a Curie–Weiss law.

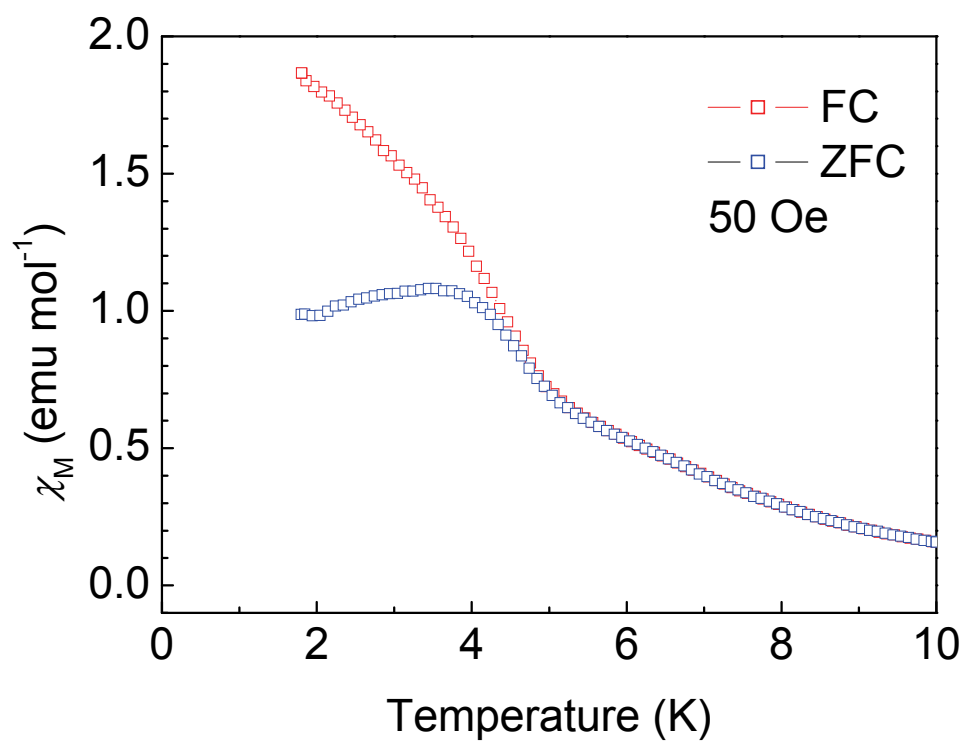

**Figure 3S.** ZFC/FC magnetization for **1** at an applied field of 50 G.

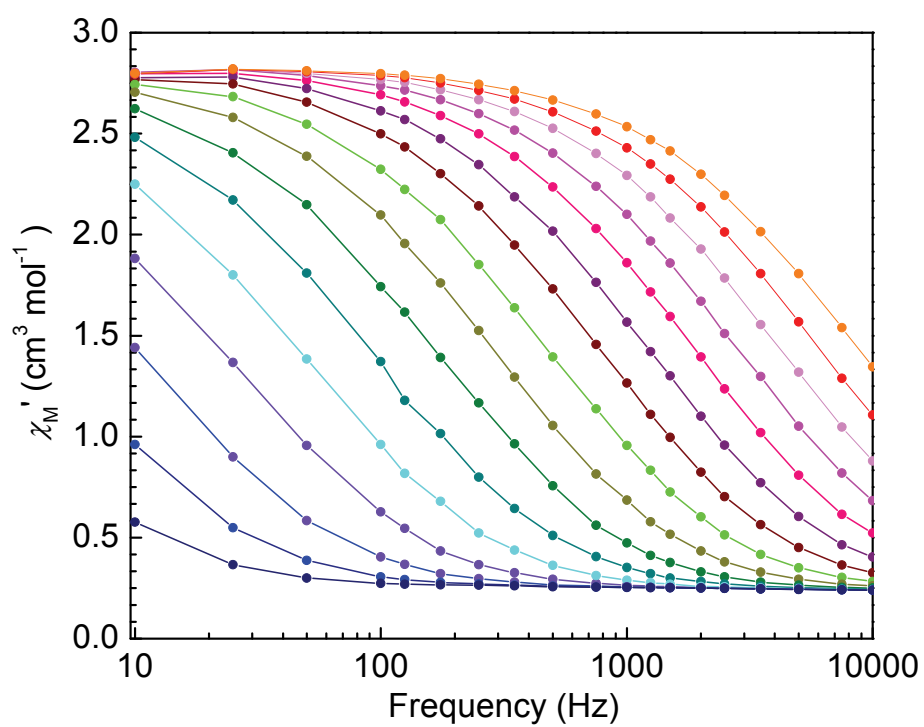

**Figure 4S.** Plots of in-phase ( $\chi_M'$ ) of ac susceptibility vs. frequency in a 3.5 G ac field oscillating at the indicate temperatures for complex **1**.



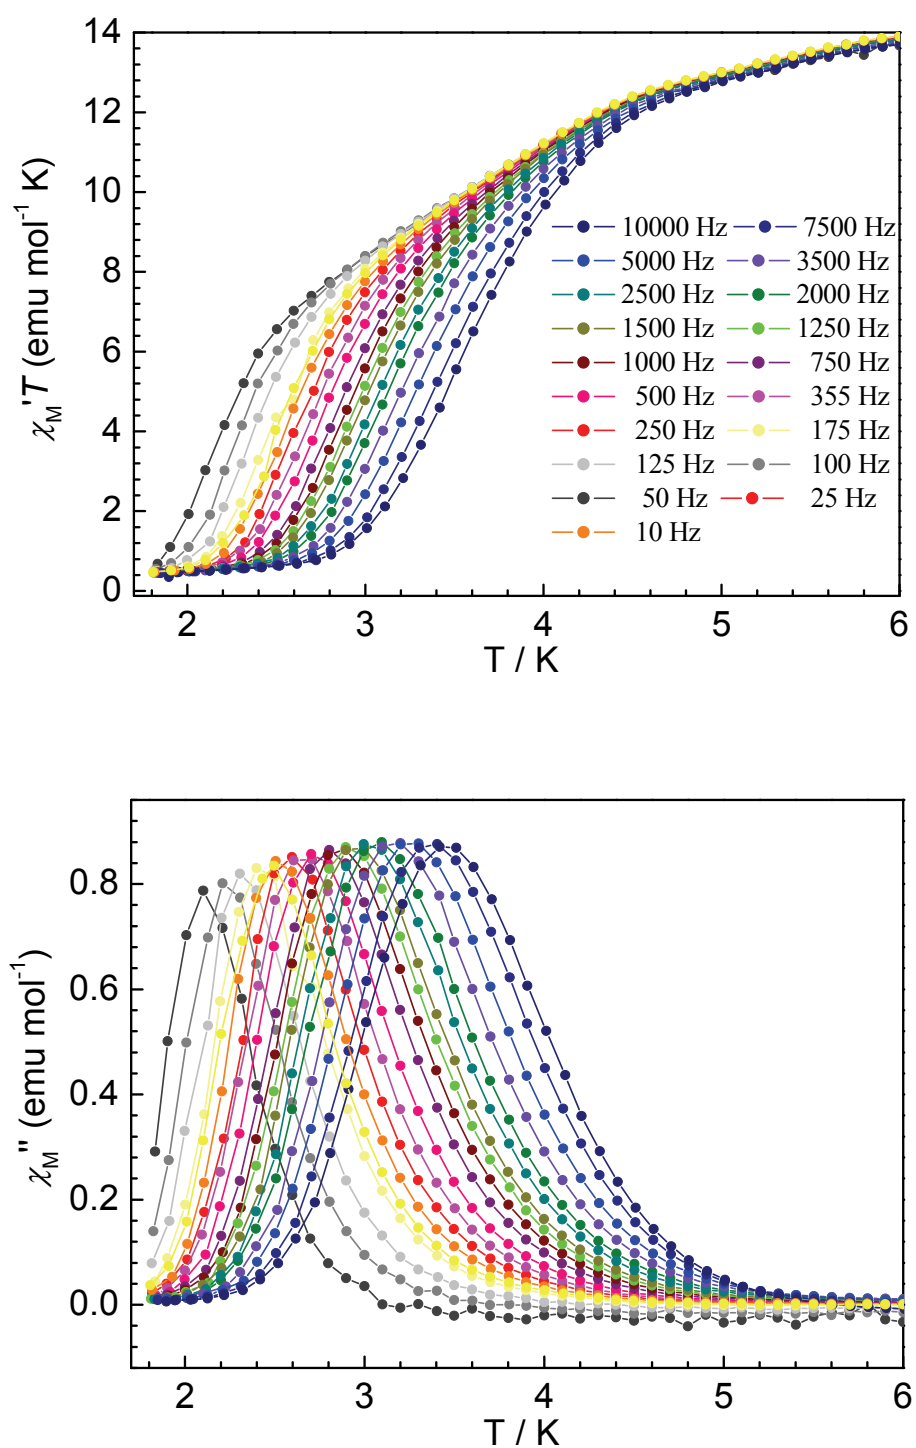

**Figure 5S.** Plots of in-phase ( $\chi_M' T$ ) (Top) and out-of-phase ( $\chi_M''$ ) (Bottom) of ac susceptibility vs.  $T$  in a 3.5 G ac field oscillating at the indicate frequencies for complex **1**.

A scaling procedure of the  $\chi_M T$  data for **1** (Figure 6S) clearly indicates a linear regime characteristic of Ising 1D systems. The  $\ln(\chi_M' T)$  versus  $1/T$  plot increases linearly between 8 and 14 K, with an energy gap,  $\Delta_\xi$ , of 16 K. It should be noted that the  $\Delta E$  barrier extracted from the ac data is significantly larger than  $\Delta_\xi$ , suggesting that the relaxation mechanism in this SCM cannot be described by a simple Glauber model.<sup>3</sup>

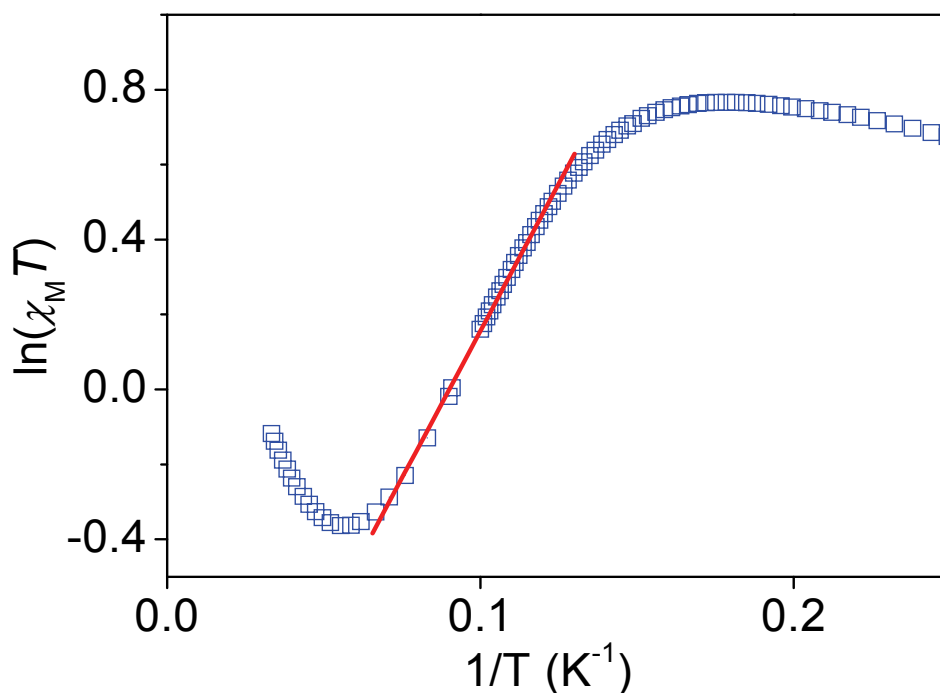

**Figure 6S.** Plot of  $\ln(\chi_M' T)$  vs.  $T^{-1}$  for **1**. Solid line represents the fit of  $\chi T = C_{\text{eff}} \exp(\Delta_\xi/k_B T)$  between 8 and 14 K.

3. C. Coulon, R. Clérac, L. Lecren, W. Wernsdorfer, H. Miyasaka, *Phys. Rev. B* 2004, **69**, 132408.

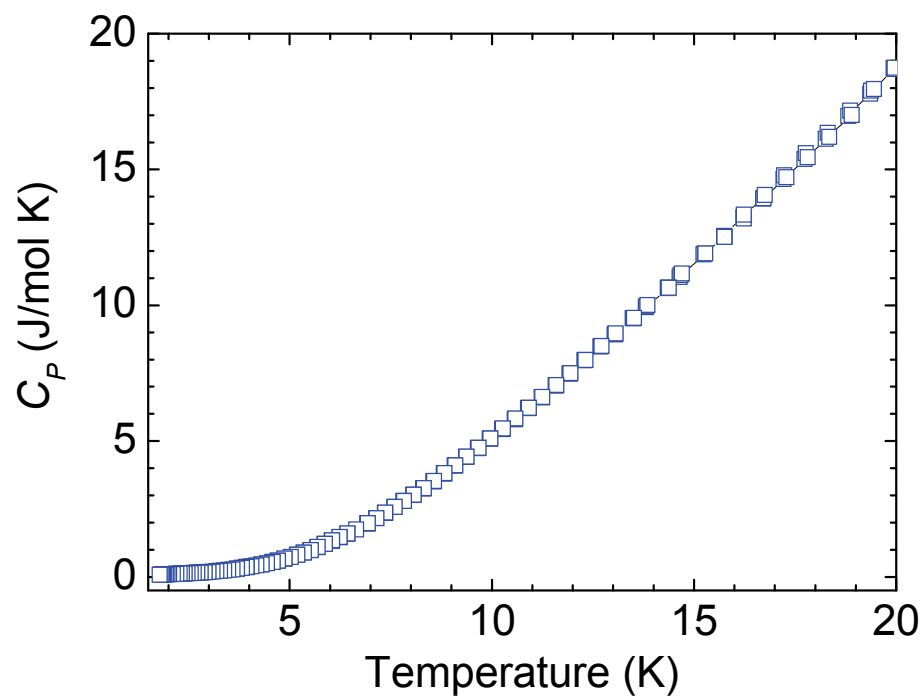

**Figure 7S.** Plot of  $C_p$  vs.  $T$  for a pellet piece polycrystalline of **1** measured on grounded crystals under zero applied field.
